# Supplementary material for: A Pilot Study of the Clinical Effectiveness of a Single Intra-Articular Injection of Stanozolol in Canines with Knee Degenerative Joint Disease and Its Correlation with Serum Interleukin-1β Levels
Source: MDPI journal article supplement (doi:10.3390/ani14091351), 2024-04-30
Supplement: s1 [file s1]

**Table S1.** Form used for recording during the clinical trial, as well as the study variables and owners' opinions.

| Evaluation by Clinicians                                                                       |                   |      |             |   |             |   |                                   |           |   |   |           |                       |           |   |
|------------------------------------------------------------------------------------------------|-------------------|------|-------------|---|-------------|---|-----------------------------------|-----------|---|---|-----------|-----------------------|-----------|---|
| types of lameness                                                                              |                   |      |             |   |             |   |                                   |           |   |   |           |                       |           |   |
| T0                                                                                             | absent            | 0    | starts cold | 1 | starts warm | 2 | starts cold,worsens with exercise |           |   |   |           | 3                     | permanent | 4 |
| T2                                                                                             | absent            | 0    | starts cold | 1 | starts warm | 2 | starts cold,worsens with exercise |           |   |   |           | 3                     | permanent | 4 |
| T2                                                                                             | absent            | 0    | starts cold | 1 | starts warm | 2 | starts cold,worsens with exercise |           |   |   |           | 3                     | permanent | 4 |
| T3                                                                                             | absent            | 0    | starts cold | 1 | starts warm | 2 | starts cold,worsens with exercise |           |   |   |           | 3                     | permanent | 4 |
| Describing the pain on manipulation at this moment                                             |                   |      |             |   |             |   |                                   |           |   |   |           |                       |           |   |
| T0                                                                                             | absent            | 0    | 1           | 2 | 3           | 4 | 5                                 | 6         | 7 | 8 | 9         | intense pain          | 10        |   |
| T2                                                                                             | absent            | 0    | 1           | 2 | 3           | 4 | 5                                 | 6         | 7 | 8 | 9         | intense pain          | 10        |   |
| T2                                                                                             | absent            | 0    | 1           | 2 | 3           | 4 | 5                                 | 6         | 7 | 8 | 9         | intense pain          | 10        |   |
| T3                                                                                             | absent            | 0    | 1           | 2 | 3           | 4 | 5                                 | 6         | 7 | 8 | 9         | intense pain          | 10        |   |
| To what extent does the pain interfere with the patient's ability to stand up after lying down |                   |      |             |   |             |   |                                   |           |   |   |           |                       |           |   |
| T0                                                                                             | Doesn't interfere | 0    | 1           | 2 | 3           | 4 | 5                                 | 6         | 7 | 8 | 9         | completely interferes | 10        |   |
| T2                                                                                             | Doesn't interfere | 0    | 1           | 2 | 3           | 4 | 5                                 | 6         | 7 | 8 | 9         | completely interferes | 10        |   |
| T2                                                                                             | Doesn't interfere | 0    | 1           | 2 | 3           | 4 | 5                                 | 6         | 7 | 8 | 9         | completely interferes | 10        |   |
| T3                                                                                             | Doesn't interfere | 0    | 1           | 2 | 3           | 4 | 5                                 | 6         | 7 | 8 | 9         | completely interferes | 10        |   |
| To what extent does the pain interfere with the patient's ability to walk                      |                   |      |             |   |             |   |                                   |           |   |   |           |                       |           |   |
| T0                                                                                             | Doesn't interfere | 0    | 1           | 2 | 3           | 4 | 5                                 | 6         | 7 | 8 | 9         | completely interferes | 10        |   |
| T2                                                                                             | Doesn't interfere | 0    | 1           | 2 | 3           | 4 | 5                                 | 6         | 7 | 8 | 9         | completely interferes | 10        |   |
| T2                                                                                             | Doesn't interfere | 0    | 1           | 2 | 3           | 4 | 5                                 | 6         | 7 | 8 | 9         | completely interferes | 10        |   |
| T3                                                                                             | Doesn't interfere | 0    | 1           | 2 | 3           | 4 | 5                                 | 6         | 7 | 8 | 9         | completely interferes | 10        |   |
| To what extent does the pain interfere with the patient's ability to run                       |                   |      |             |   |             |   |                                   |           |   |   |           |                       |           |   |
| T0                                                                                             | Doesn't interfere | 0    | 1           | 2 | 3           | 4 | 5                                 | 6         | 7 | 8 | 9         | completely interferes | 10        |   |
| T2                                                                                             | Doesn't interfere | 0    | 1           | 2 | 3           | 4 | 5                                 | 6         | 7 | 8 | 9         | completely interferes | 10        |   |
| T2                                                                                             | Doesn't interfere | 0    | 1           | 2 | 3           | 4 | 5                                 | 6         | 7 | 8 | 9         | completely interferes | 10        |   |
| T3                                                                                             | Doesn't interfere | 0    | 1           | 2 | 3           | 4 | 5                                 | 6         | 7 | 8 | 9         | completely interferes | 10        |   |
| How would you classify the current quality of life of the patient                              |                   |      |             |   |             |   |                                   |           |   |   |           |                       |           |   |
| T0                                                                                             | Poor              | fair |             |   | good        |   |                                   | very good |   |   | excellent |                       |           |   |
| T2                                                                                             | Poor              | fair |             |   | good        |   |                                   | very good |   |   | excellent |                       |           |   |
| T2                                                                                             | Poor              | fair |             |   | good        |   |                                   | very good |   |   | excellent |                       |           |   |
| T3                                                                                             | Poor              | fair |             |   | good        |   |                                   | very good |   |   | excellent |                       |           |   |
| Evaluation by Tutors                                                                           |                   |      |             |   |             |   |                                   |           |   |   |           |                       |           |   |
| What best describes the major pain level experienced by your pet during the last 7 days        |                   |      |             |   |             |   |                                   |           |   |   |           |                       |           |   |
| T0                                                                                             | absent            | 0    | 1           | 2 | 3           | 4 | 5                                 | 6         | 7 | 8 | 9         | intense pain          | 10        |   |
| T2                                                                                             | absent            | 0    | 1           | 2 | 3           | 4 | 5                                 | 6         | 7 | 8 | 9         | intense pain          | 10        |   |
| T2                                                                                             | absent            | 0    | 1           | 2 | 3           | 4 | 5                                 | 6         | 7 | 8 | 9         | intense pain          | 10        |   |
| T3                                                                                             | absent            | 0    | 1           | 2 | 3           | 4 | 5                                 | 6         | 7 | 8 | 9         | intense pain          | 10        |   |
| What best describes the minor pain level experienced by your pet during the last 7 day         |                   |      |             |   |             |   |                                   |           |   |   |           |                       |           |   |
| T0                                                                                             | absent            | 0    | 1           | 2 | 3           | 4 | 5                                 | 6         | 7 | 8 | 9         | intense pain          | 10        |   |
| T2                                                                                             | absent            | 0    | 1           | 2 | 3           | 4 | 5                                 | 6         | 7 | 8 | 9         | intense pain          | 10        |   |
| T2                                                                                             | absent            | 0    | 1           | 2 | 3           | 4 | 5                                 | 6         | 7 | 8 | 9         | intense pain          | 10        |   |
| T3                                                                                             | absent            | 0    | 1           | 2 | 3           | 4 | 5                                 | 6         | 7 | 8 | 9         | intense pain          | 10        |   |
| What best describes the average level of pain experienced during the last 7 days               |                   |      |             |   |             |   |                                   |           |   |   |           |                       |           |   |
| T0                                                                                             | absent            | 0    | 1           | 2 | 3           | 4 | 5                                 | 6         | 7 | 8 | 9         | intense pain          | 10        |   |
| T2                                                                                             | absent            | 0    | 1           | 2 | 3           | 4 | 5                                 | 6         | 7 | 8 | 9         | intense pain          | 10        |   |
| T2                                                                                             | absent            | 0    | 1           | 2 | 3           | 4 | 5                                 | 6         | 7 | 8 | 9         | intense pain          | 10        |   |
| T3                                                                                             | absent            | 0    | 1           | 2 | 3           | 4 | 5                                 | 6         | 7 | 8 | 9         | intense pain          | 10        |   |

| Describing the pain on manipulation at this moment                                                          |                   |      |   |   |      |   |   |           |   |   |           |                       |    |
|-------------------------------------------------------------------------------------------------------------|-------------------|------|---|---|------|---|---|-----------|---|---|-----------|-----------------------|----|
| T0                                                                                                          | absent            | 0    | 1 | 2 | 3    | 4 | 5 | 6         | 7 | 8 | 9         | intense pain          | 10 |
| T2                                                                                                          | absent            | 0    | 1 | 2 | 3    | 4 | 5 | 6         | 7 | 8 | 9         | intense pain          | 10 |
| T2                                                                                                          | absent            | 0    | 1 | 2 | 3    | 4 | 5 | 6         | 7 | 8 | 9         | intense pain          | 10 |
| T3                                                                                                          | absent            | 0    | 1 | 2 | 3    | 4 | 5 | 6         | 7 | 8 | 9         | intense pain          | 10 |
| Function description                                                                                        |                   |      |   |   |      |   |   |           |   |   |           |                       |    |
| Describe how pain has interfered with overall activity in the last 7 days                                   |                   |      |   |   |      |   |   |           |   |   |           |                       |    |
| T0                                                                                                          | Doesn't interfere | 0    | 1 | 2 | 3    | 4 | 5 | 6         | 7 | 8 | 9         | completely interferes | 10 |
| T2                                                                                                          | Doesn't interfere | 0    | 1 | 2 | 3    | 4 | 5 | 6         | 7 | 8 | 9         | completely interferes | 10 |
| T2                                                                                                          | Doesn't interfere | 0    | 1 | 2 | 3    | 4 | 5 | 6         | 7 | 8 | 9         | completely interferes | 10 |
| T3                                                                                                          | Doesn't interfere | 0    | 1 | 2 | 3    | 4 | 5 | 6         | 7 | 8 | 9         | completely interferes | 10 |
| Describe how pain has interfered with quality of life in the last 7 days                                    |                   |      |   |   |      |   |   |           |   |   |           |                       |    |
| T0                                                                                                          | Doesn't interfere | 0    | 1 | 2 | 3    | 4 | 5 | 6         | 7 | 8 | 9         | completely interferes | 10 |
| T2                                                                                                          | Doesn't interfere | 0    | 1 | 2 | 3    | 4 | 5 | 6         | 7 | 8 | 9         | completely interferes | 10 |
| T2                                                                                                          | Doesn't interfere | 0    | 1 | 2 | 3    | 4 | 5 | 6         | 7 | 8 | 9         | completely interferes | 10 |
| T3                                                                                                          | Doesn't interfere | 0    | 1 | 2 | 3    | 4 | 5 | 6         | 7 | 8 | 9         | completely interferes | 10 |
| Describe how pain has interfered with the ability to stand up after lying down in the last 7 days           |                   |      |   |   |      |   |   |           |   |   |           |                       |    |
| T0                                                                                                          | Doesn't interfere | 0    | 1 | 2 | 3    | 4 | 5 | 6         | 7 | 8 | 9         | completely interferes | 10 |
| T2                                                                                                          | Doesn't interfere | 0    | 1 | 2 | 3    | 4 | 5 | 6         | 7 | 8 | 9         | completely interferes | 10 |
| T2                                                                                                          | Doesn't interfere | 0    | 1 | 2 | 3    | 4 | 5 | 6         | 7 | 8 | 9         | completely interferes | 10 |
| T3                                                                                                          | Doesn't interfere | 0    | 1 | 2 | 3    | 4 | 5 | 6         | 7 | 8 | 9         | completely interferes | 10 |
| Describe how pain has interfered with the ability to walk in the last 7 days                                |                   |      |   |   |      |   |   |           |   |   |           |                       |    |
| T0                                                                                                          | Doesn't interfere | 0    | 1 | 2 | 3    | 4 | 5 | 6         | 7 | 8 | 9         | completely interferes | 10 |
| T2                                                                                                          | Doesn't interfere | 0    | 1 | 2 | 3    | 4 | 5 | 6         | 7 | 8 | 9         | completely interferes | 10 |
| T2                                                                                                          | Doesn't interfere | 0    | 1 | 2 | 3    | 4 | 5 | 6         | 7 | 8 | 9         | completely interferes | 10 |
| T3                                                                                                          | Doesn't interfere | 0    | 1 | 2 | 3    | 4 | 5 | 6         | 7 | 8 | 9         | completely interferes | 10 |
| Describe how pain has interfered with the ability to run in the last 7 days                                 |                   |      |   |   |      |   |   |           |   |   |           |                       |    |
| T0                                                                                                          | Doesn't interfere | 0    | 1 | 2 | 3    | 4 | 5 | 6         | 7 | 8 | 9         | completely interferes | 10 |
| T2                                                                                                          | Doesn't interfere | 0    | 1 | 2 | 3    | 4 | 5 | 6         | 7 | 8 | 9         | completely interferes | 10 |
| T2                                                                                                          | Doesn't interfere | 0    | 1 | 2 | 3    | 4 | 5 | 6         | 7 | 8 | 9         | completely interferes | 10 |
| T3                                                                                                          | Doesn't interfere | 0    | 1 | 2 | 3    | 4 | 5 | 6         | 7 | 8 | 9         | completely interferes | 10 |
| Describe how pain has interfered with the ability to climb stairs, sidewalks, steps, ... in the last 7 days |                   |      |   |   |      |   |   |           |   |   |           |                       |    |
| T0                                                                                                          | Doesn't interfere | 0    | 1 | 2 | 3    | 4 | 5 | 6         | 7 | 8 | 9         | completely interferes | 10 |
| T2                                                                                                          | Doesn't interfere | 0    | 1 | 2 | 3    | 4 | 5 | 6         | 7 | 8 | 9         | completely interferes | 10 |
| T2                                                                                                          | Doesn't interfere | 0    | 1 | 2 | 3    | 4 | 5 | 6         | 7 | 8 | 9         | completely interferes | 10 |
| T3                                                                                                          | Doesn't interfere | 0    | 1 | 2 | 3    | 4 | 5 | 6         | 7 | 8 | 9         | completely interferes | 10 |
| Overall appreciation                                                                                        |                   |      |   |   |      |   |   |           |   |   |           |                       |    |
| which best describes the level of quality of life of your dog in the last 7 days                            |                   |      |   |   |      |   |   |           |   |   |           |                       |    |
| T0                                                                                                          | Poor              | fair |   |   | good |   |   | very good |   |   | excellent |                       |    |
| T2                                                                                                          | Poor              | fair |   |   | good |   |   | very good |   |   | excellent |                       |    |
| T2                                                                                                          | Poor              | fair |   |   | good |   |   | very good |   |   | excellent |                       |    |
| T3                                                                                                          | Poor              | fair |   |   | good |   |   | very good |   |   | excellent |                       |    |
